# Supplementary material for: Causation of Oxidative Stress and Defense Response of a Yeast Cell Model after Treatment with Orthodontic Alloys Consisting of Metal Ions
Source: MDPI journal article supplement (doi:10.3390/antiox11010063), 2021-12-28
Supplement: s1 [file s1]

## Supplementary material

Table S1: ICP-MS operating parameters for determination of element concentrations.

| Parameter                          | Type/Value                                                                                                    |
|------------------------------------|---------------------------------------------------------------------------------------------------------------|
| <i>Sample introduction</i>         |                                                                                                               |
| Nebuliser                          | Miramist                                                                                                      |
| Spray chamber                      | Scott                                                                                                         |
| Skimmer and sampler                | Ni                                                                                                            |
| <i>Plasma conditions</i>           |                                                                                                               |
| Forward power                      | 1550 W                                                                                                        |
| Plasma gas flow (Ar)               | 15.0 L/min                                                                                                    |
| Carrier gas flow (Ar)              | 1.05 L/min                                                                                                    |
| Dilution gas flow (Ar)             | 0.10 L/min                                                                                                    |
| Collision gas flow (He)            | 4.5 mL/min                                                                                                    |
| Oct bias                           | -100 V                                                                                                        |
| Cell entrance                      | -100 V                                                                                                        |
| Cell exit                          | -150 V                                                                                                        |
| Deflect                            | -75 V                                                                                                         |
| Plate bias                         | -150 V                                                                                                        |
| Sample uptake rate                 | 0.3 mL/min                                                                                                    |
| <i>Data acquisition parameters</i> |                                                                                                               |
| Isotopes monitored                 | <sup>47</sup> Ti, <sup>52</sup> Cr, <sup>56</sup> Fe, <sup>59</sup> Co,<br><sup>60</sup> Ni, <sup>95</sup> Mo |
| Isotopes of internal standards     | <sup>72</sup> Ge, <sup>103</sup> Rh                                                                           |

Table S2: Release of metal ions from stainless steel, Ni-Ti and Ti-Mo archwire

| Stainless steel archwire<br>(Damon -Ormco, USA)                      | Ti<br>(ng/mL) | Cr<br>(ng/mL) | Fe<br>(ng/mL) | Co<br>(ng/mL) | Ni<br>(ng/mL) | Mo<br>(ng/mL) |
|----------------------------------------------------------------------|---------------|---------------|---------------|---------------|---------------|---------------|
| 12 h                                                                 | <0.1          | 0.36          | 3.59          | <0.01         | 0.50          | <0.05         |
| 24 h                                                                 | <0.1          | <0.05         | 2.28          | <0.01         | <0.05         | <0.05         |
| 48 h                                                                 | <0.1          | 0.23          | 3.00          | <0.01         | 0.36          | <0.05         |
| 7 days                                                               | <0.1          | 0.22          | 6.14          | <0.01         | 0.21          | <0.05         |
| 30 days                                                              | <0.1          | 0.25          | 6.36          | <0.01         | 0.23          | <0.05         |
| 60 days                                                              | <0.1          | 0.17          | 7.41          | <0.01         | <0.05         | <0.05         |
| 90 days                                                              | <0.1          | 0.58          | 13.36         | <0.01         | 2.11          | <0.05         |
| Ni-Ti archwire<br>(rematitan® super elastic -<br>Dentaurum, Germany) | Ti<br>(ng/mL) | Cr<br>(ng/mL) | Fe<br>(ng/mL) | Co<br>(ng/mL) | Ni<br>(ng/mL) | Mo<br>(ng/mL) |
| 12 h                                                                 | 0.73          | <0.05         | <0.1          | <0.01         | 0.73          | <0.05         |
| 24 h                                                                 | 0.50          | <0.05         | <0.1          | <0.01         | 1.43          | <0.05         |
| 48 h                                                                 | 1.87          | <0.05         | <0.1          | <0.01         | 2.22          | <0.05         |
| 7 days                                                               | 1.30          | <0.05         | <0.1          | <0.01         | 3.01          | <0.05         |
| 30 days                                                              | /             | /             | /             | /             | /             | /             |
| 60 days                                                              | 2.74          | <0.05         | <0.1          | <0.01         | 6.10          | <0.05         |
| 90 days                                                              | 9.59          | <0.05         | <0.1          | <0.01         | 12.97         | <0.05         |
| Ni-Ti archwire<br>(Biostarter® - Forestadent, Germany)               | Ti<br>(ng/mL) | Cr<br>(ng/mL) | Fe<br>(ng/mL) | Co<br>(ng/mL) | Ni<br>(ng/mL) | Mo<br>(ng/mL) |
| 12 h                                                                 | 0.52          | <0.05         | <0.1          | <0.01         | 24.59         | <0.05         |
| 24 h                                                                 | 0.50          | <0.05         | <0.1          | <0.01         | 41.81         | <0.05         |
| 48 h                                                                 | 2.28          | <0.05         | <0.1          | <0.01         | 60.62         | <0.05         |
| 7 days                                                               | <0.1          | <0.05         | <0.1          | <0.01         | 44.23         | <0.05         |
| 30 days                                                              | 5.27          | <0.05         | <0.1          | <0.01         | 94.03         | <0.05         |
| 60 days                                                              | 10.07         | <0.05         | <0.1          | <0.01         | 131.93        | <0.05         |
| 90 days                                                              | 9.53          | <0.05         | <0.1          | <0.01         | 116.66        | <0.05         |

Table S2 (continued): Release of metal ions from Co-Cr-Ni archwire, stainless steel brackets and molar bands

| Ti-Mo archwire<br>(rematitan® SPECIAL -<br>Dentaurum, Germany)        | Ti<br>(ng/mL) | Cr<br>(ng/mL) | Fe<br>(ng/mL) | Co<br>(ng/mL) | Ni<br>(ng/mL) | Mo<br>(ng/mL) |
|-----------------------------------------------------------------------|---------------|---------------|---------------|---------------|---------------|---------------|
| 12 h                                                                  | <0.1          | <0.05         | <0.1          | <0.01         | <0.05         | <0.05         |
| 24 h                                                                  | 1.04          | <0.05         | <0.1          | <0.01         | <0.05         | <0.05         |
| 48 h                                                                  | 1.64          | <0.05         | <0.1          | <0.01         | <0.05         | <0.05         |
| 7 days                                                                | 0.76          | <0.05         | <0.1          | <0.01         | <0.05         | <0.05         |
| 30 days                                                               | 2.39          | <0.05         | <0.1          | <0.01         | <0.05         | <0.05         |
| 60 days                                                               | 1.12          | <0.05         | <0.1          | <0.01         | <0.05         | <0.05         |
| 90 days                                                               | 8.26          | <0.05         | <0.1          | <0.01         | <0.05         | 0.45          |
| Co-Cr-Ni archwire<br>(Elgiloy® - Rocky Mountain<br>Orthodontics, USA) | Ti<br>(ng/mL) | Cr<br>(ng/mL) | Fe<br>(ng/mL) | Co<br>(ng/mL) | Ni<br>(ng/mL) | Mo<br>(ng/mL) |
| 12 h                                                                  | <0.1          | 0.16          | 1.27          | 6.21          | 0.90          | 0.27          |
| 24 h                                                                  | <0.1          | 0.42          | 4.59          | 9.43          | 2.02          | 0.78          |
| 48 h                                                                  | <0.1          | 0.85          | 8.29          | 14.49         | 3.79          | 1.28          |
| 7 days                                                                | <0.1          | 0.52          | 4.08          | 13.54         | 3.37          | 1.02          |
| 30 days                                                               | <0.1          | 1.23          | 11.68         | 24.74         | 6.80          | 1.95          |
| 60 days                                                               | <0.1          | 1.58          | 13.84         | 30.46         | 8.29          | 2.47          |
| 90 days                                                               | <0.1          | 1.66          | 13.77         | 31.45         | 8.55          | 2.54          |
| Co-Cr-Ni archwire<br>(Remaloy® - Dentaurum, Germany)                  | Ti<br>(ng/mL) | Cr<br>(ng/mL) | Fe<br>(ng/mL) | Co<br>(ng/mL) | Ni<br>(ng/mL) | Mo<br>(ng/mL) |
| 12 h                                                                  | <0.1          | <0.05         | <0.1          | 8.96          | 1.86          | <0.05         |
| 24 h                                                                  | <0.1          | 0.34          | 1.42          | 13.27         | 3.77          | <0.05         |
| 48 h                                                                  | <0.1          | 0.92          | 6.67          | 13.38         | 3.94          | <0.05         |
| 7 days                                                                | <0.1          | 0.42          | 1.62          | 17.02         | 5.06          | <0.05         |
| 30 days                                                               | <0.1          | 1.22          | 4.74          | 28.68         | 10.14         | <0.05         |
| 60 days                                                               | <0.1          | 1.40          | 6.80          | 31.56         | 11.07         | <0.05         |
| 90 days                                                               | <0.1          | 1.15          | 4.66          | 28.98         | 9.09          | <0.05         |

Table S2 (continued): Release of metal ions from Co-Cr-Ni archwire, stainless steel brackets and molar bands

| Stainless steel brackets<br>(Discovery® -<br>Dentaurum, Germany)    | Ti<br>(ng/mL) | Cr<br>(ng/mL) | Fe<br>(ng/mL) | Co<br>(ng/mL) | Ni<br>(ng/mL) | Mo<br>(ng/mL) |
|---------------------------------------------------------------------|---------------|---------------|---------------|---------------|---------------|---------------|
| 12 h                                                                | <0.1          | 0.82          | 8.27          | <0.01         | 1.10          | <0.05         |
| 24 h                                                                | <0.1          | 1.05          | 13.96         | <0.01         | 1.72          | 0.15          |
| 48 h                                                                | <0.1          | 2.64          | 39.45         | <0.01         | 4.19          | 0.70          |
| 7 days                                                              | <0.1          | 1.99          | 70.07         | <0.01         | 3.89          | 0.47          |
| 30 days                                                             | <0.1          | 4.50          | 126.48        | <0.01         | 10.07         | 1.25          |
| 60 days                                                             | <0.1          | 6.36          | 178.31        | <0.01         | 22.29         | 1.66          |
| 90 days                                                             | <0.1          | 6.92          | 200.25        | <0.01         | 37.03         | 1.83          |
| Stainless steel molar bands<br>(W-Fit Form<br>Forestadent, Germany) | Ti<br>(ng/mL) | Cr<br>(ng/mL) | Fe<br>(ng/mL) | Co<br>(ng/mL) | Ni<br>(ng/mL) | Mo<br>(ng/mL) |
| 12 h                                                                | <0.1          | 1.01          | 23.02         | <0.01         | 1.85          | <0.05         |
| 24 h                                                                | <0.1          | 3.73          | 36.85         | <0.01         | 4.01          | <0.05         |
| 48 h                                                                | <0.1          | 1.52          | 45.30         | <0.01         | 3.45          | <0.05         |
| 7 days                                                              | <0.1          | 7.01          | 67.99         | <0.01         | 7.67          | <0.05         |
| 30 days                                                             | <0.1          | 2.72          | 70.64         | <0.01         | 6.59          | <0.05         |
| 60 days                                                             | <0.1          | 3.13          | 70.84         | <0.01         | 7.73          | <0.05         |
| 90 days                                                             | <0.1          | 7.44          | 113.98        | <0.01         | 11.31         | <0.05         |
